# Supplementary material for: A Unique Core–Shell Structured, Glycol Chitosan-Based Nanoparticle Achieves Cancer-Selective Gene Delivery with Reduced Off-Target Effects
Source: MDPI journal article supplement (doi:10.3390/pharmaceutics14020373), 2022-02-07
Supplement: s1 [file s1]

# Supplementary Materials: A Unique Core–Shell Structured, Glycol Chitosan-Based Nanoparticle Achieves Cancer-Selective Gene Delivery with Reduced Off-Target Effects

Bei Cheng, Hye-Hyun Ahn, Hwanhee Nam, Zirui Jiang, Feng J. Gao, Il Minn and Martin G. Pomper

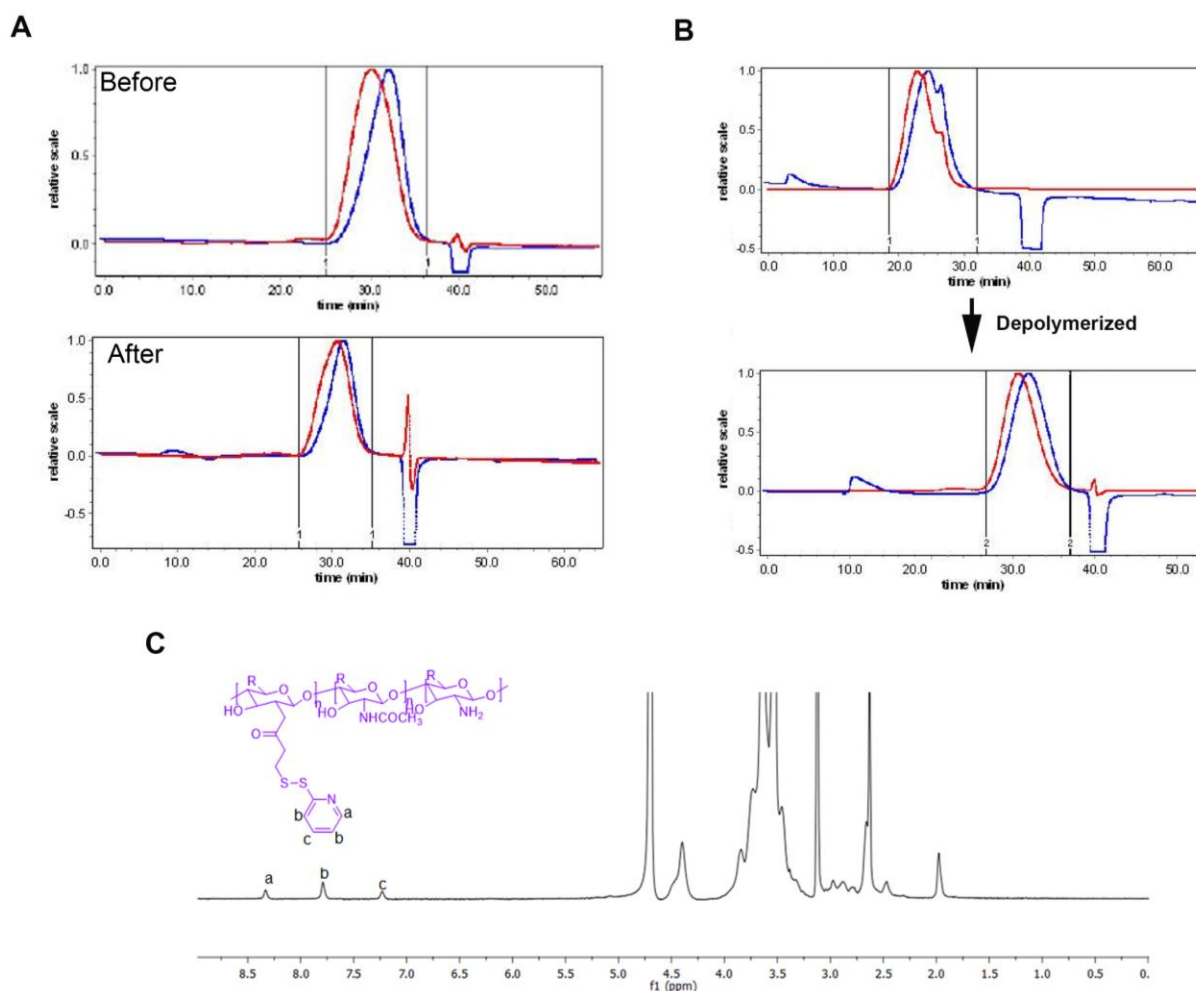

**Figure S1.** Polymer characterization. (A) Gel permeation chromatography (GPC) spectrum of PEI before and after thiolation; (B) GPC spectrum of GCS before and after depolymerization; (C)  $^1\text{H}$ NMR spectrum of GCS-PDP.

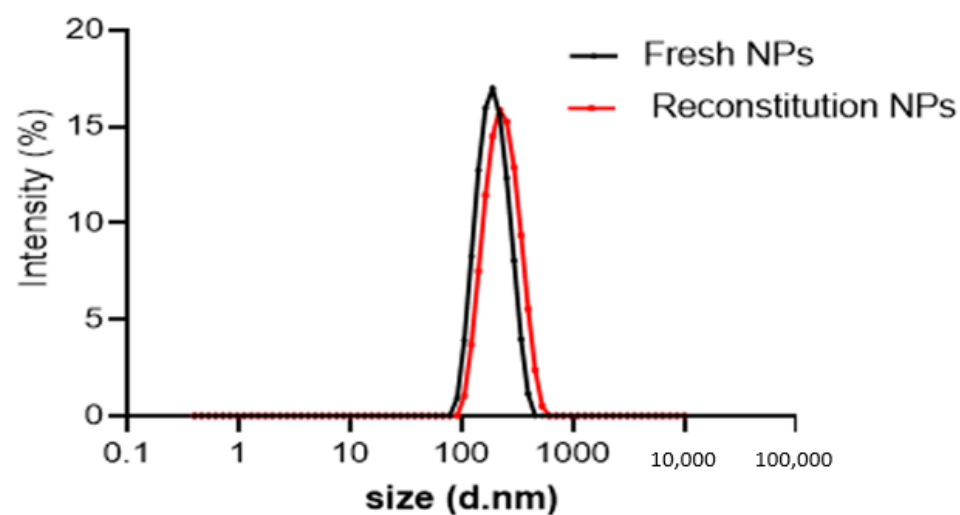

**Figure S2.** Size distribution of GCS-PDP/PEI-SH/DNA nanoparticles (GNP) before and after the lyophilization.

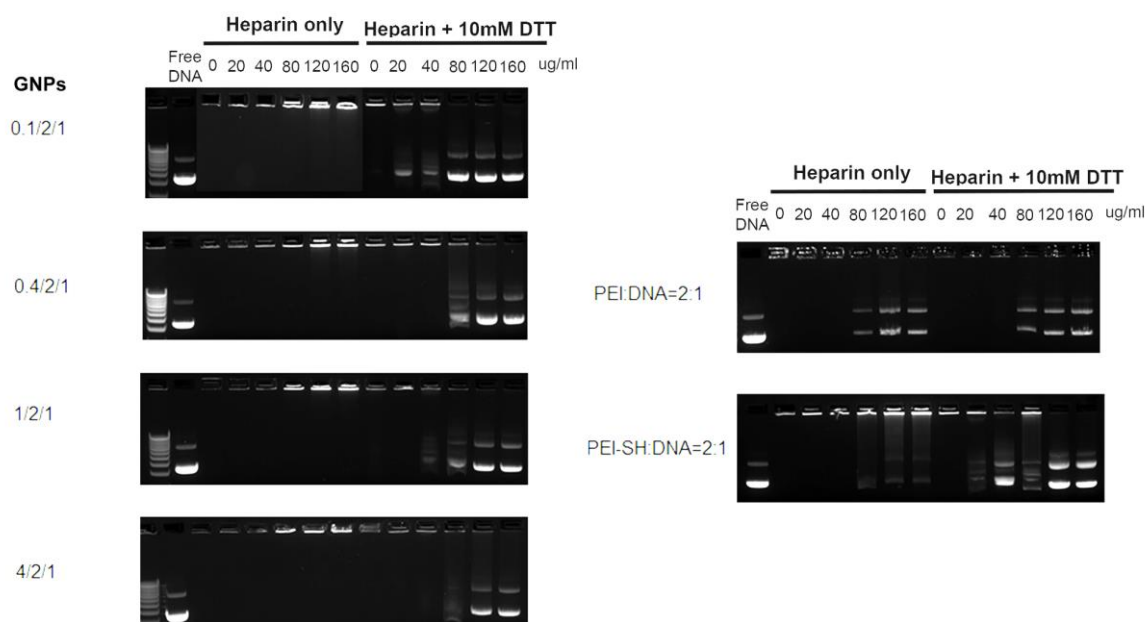

**Figure S3.** DNA release from GNPs, PEI/DNA, and PEI-SH/DNA in response to DTT and heparin.

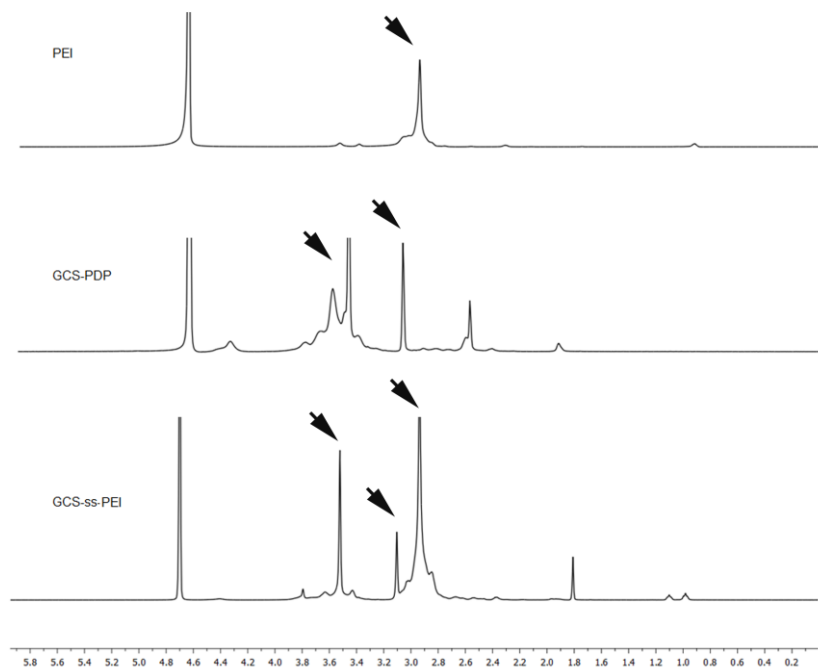

**Figure S4.**  $^1\text{H}$ NMR spectra of PEI, GCS-PDP and GCS-ss-PEI. Arrows points to the characteristic proton resonance peaks correspond to PEI, GCS-PDP, and GCS-ss-PEI.

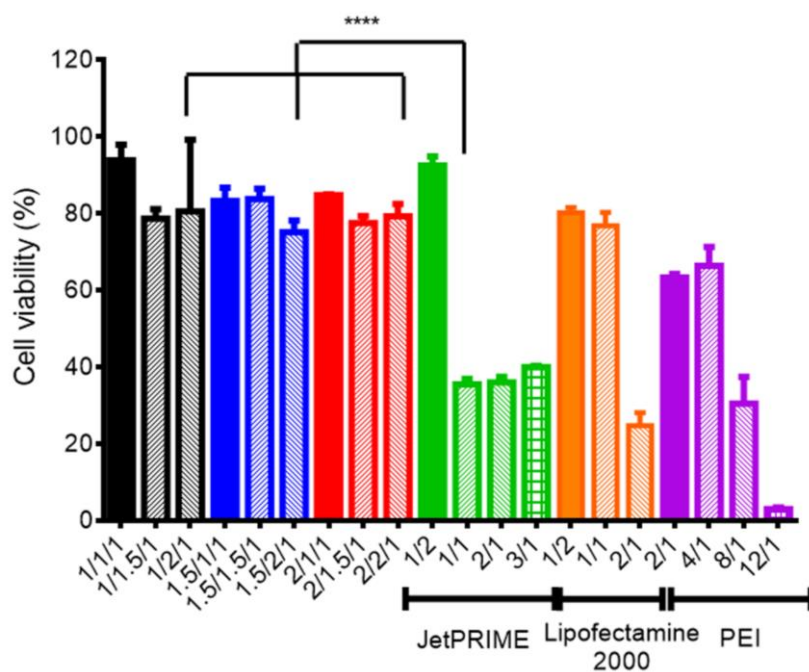

**Figure S5.** Cytotoxicity of different formulations in the medium containing 20% FBS as determined by MTT assay (\*\*\*\*  $p < 0.0001$ ).

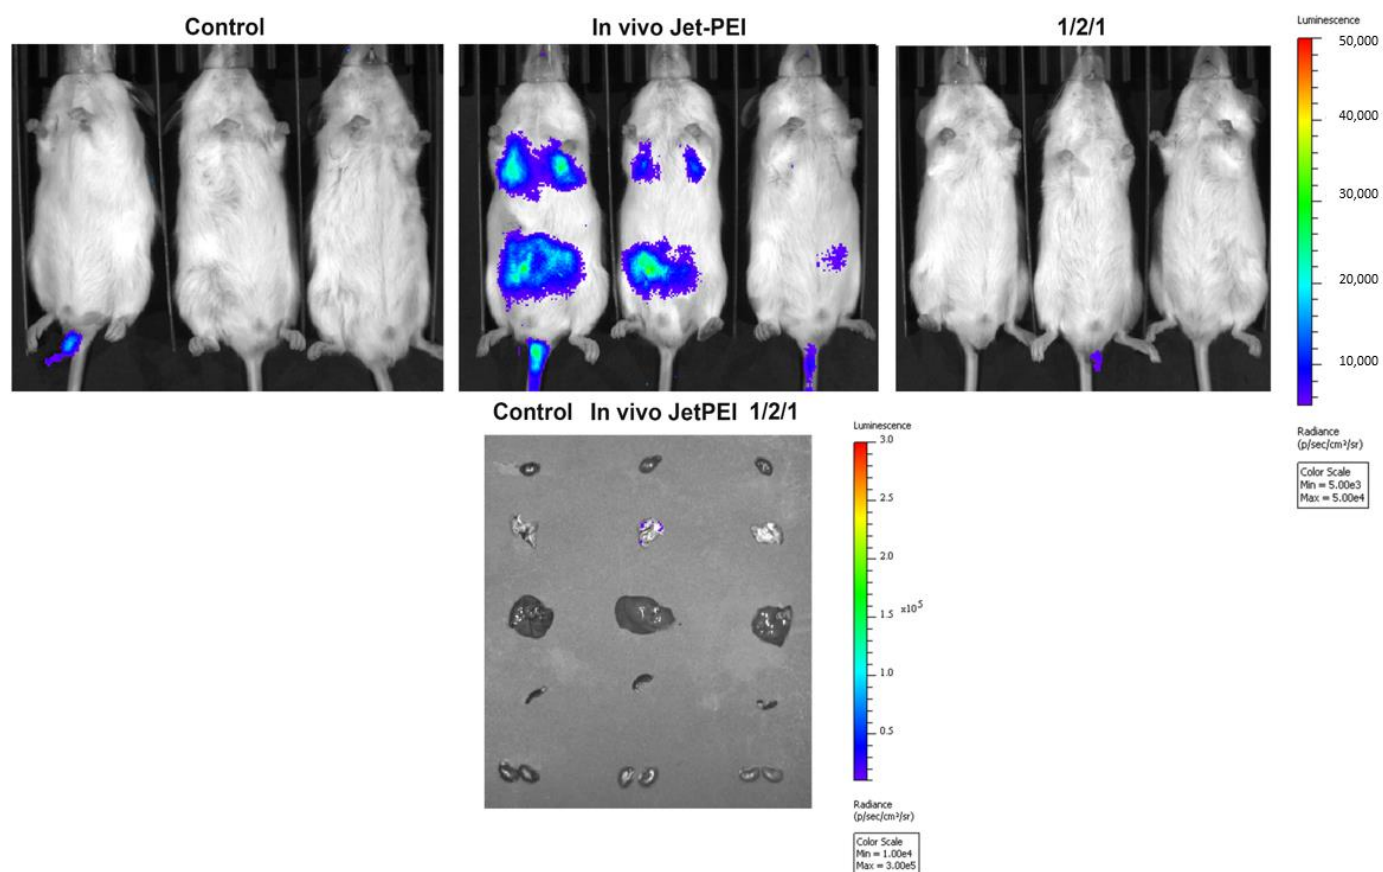

**Figure S6.** NSG mice without PC3 cancer cell injections were treated with GNP (1/2/1) and in vivo JetPEI containing pSur-fLuc for 3 days, and whole-body luciferase expression was quantified.
